# Supplementary material for: Thymine DNA glycosylase recognizes the geometry alteration of minor grooves induced by 5-formylcytosine and 5-carboxylcytosine
Source: Royal Society of Chemistry journal article supplement (doi:10.1039/c9sc02807b), 2019-01-01
Supplement: c9sc02807b1.pdf [file c9sc02807b1.pdf]

## SUPPLEMENTARY INFORMATION FOR

### **Thymine DNA glycosylase recognizes the geometry alternation of minor groove induced by 5-formylcytosine and 5-carboxylcytosine**

Tianran Fu<sup>1,2§</sup>, Liping Liu<sup>3,4§</sup>, Qing-Lin Yang<sup>5§</sup>, Yuxin Wang<sup>1,2</sup>, Pan Xu<sup>3,4</sup>, Lin Zhang<sup>1,2</sup>, Shien Liu<sup>3,4</sup>, Qing Dai<sup>6</sup>, Qianjiang Ji<sup>7</sup>, Guo-Liang Xu<sup>5</sup>, Chuan He<sup>6</sup>, Cheng Luo<sup>3,4\*</sup> and Liang Zhang<sup>1,2\*</sup>

<sup>1</sup>Department of Pharmacology and Chemical Biology, Shanghai Jiao Tong University School of Medicine, Shanghai, P. R. China; <sup>2</sup>Shanghai Universities Collaborative Innovation Center for Translational Medicine, Shanghai, P. R. China; <sup>3</sup>CAS Key Laboratory of Receptor Research, State Key Laboratory of Drug Research, Shanghai Institute of Materia Medica, Chinese Academy of Sciences, Shanghai, China; <sup>4</sup>University of Chinese Academy of Sciences, Beijing 100049, China; <sup>5</sup>State Key Laboratory of Molecular Biology, Chinese Academy of Sciences Center for Excellence in Molecular Cell Science, Shanghai Institute of Biochemistry and Cell Biology, Chinese Academy of Sciences, University of Chinese Academy of Sciences, Shanghai, China. <sup>6</sup>Department of Chemistry, Department of Biochemistry and Molecular Biology, and Institute for Biophysical Dynamics, The University of Chicago, Chicago, Illinois, USA. <sup>7</sup>School of Physical Science and Technology, ShanghaiTech University, Shanghai, China.

§These authors contributed equally to this work.

\*Correspondence: Liang Zhang: [liangzhang2014@sjtu.edu.cn](mailto:liangzhang2014@sjtu.edu.cn); Cheng Luo: [cluo@simmm.ac.cn](mailto:cluo@simmm.ac.cn);

This PDF file includes:

Supplementary Table S1 and S2; Supplementary Figures S1 to S3;

**Table S1. Data Collection and Refinement Statistics**

|                                      | 5mC-dsDNA              | 5hmC-dsDNA             |
|--------------------------------------|------------------------|------------------------|
| <b>Data collection</b>               |                        |                        |
| Space group                          | C2                     | C2                     |
| Cell dimensions                      |                        |                        |
| a, b, c(Å)                           | 31.606, 25.788, 34.215 | 63.907, 23.818, 85.556 |
| $\alpha$ , $\beta$ , $\gamma$ (°)    | 90.00, 115.934, 90.00  | 90.00, 111.117, 90.00  |
| Wavelength (Å)                       | 0.9795                 | 0.9795                 |
| Resolution (Å)*                      | 50-1.40 (1.45-1.40)    | 50-2.85 (2.95-2.85)    |
| R <sub>merge</sub> (%)               | 5.7 (7.9)              | 10.1 (52.2)            |
| I/ $\sigma$ I                        | 29.5 (24.3)            | 16.7 (3.3)             |
| Completeness (%)                     | 99.1 (100)             | 99.9 (99.3)            |
| Redundancy                           | 6.6 (6.7)              | 6.2(5.6)               |
| <b>Refinement</b>                    |                        |                        |
| Resolution (Å)                       | 30.7-1.40              | 26.6-2.85              |
| No.reflections                       | 4932                   | 2611                   |
| R <sub>work</sub> /R <sub>free</sub> | 0.182/0.217            | 0.231/0.282            |
| No.atoms                             |                        |                        |
| Nucleic acids                        | 203                    | 816                    |

|                  |        |        |
|------------------|--------|--------|
| Water            | 86     | N/A    |
| Ligand/ion       | N/A    | N/A    |
| B-factors        |        |        |
| Nucleic acids    | 15.676 | 41.246 |
| Water            | 27.308 | N/A    |
| Ligand/ion       | N/A    | N/A    |
| R.m.s deviations |        |        |
| Bond lengths (Å) | 0.005  | 0.005  |
| Bond angles (°)  | 0.933  | 1.423  |

---

\*Highest-resolution shell is shown in parentheses.

**Table S2.**  $K_{\max}$  of wild-type TDG and TDG R275A in excision of uracil containing substrate.

| Enzyme    | Substrate | $k_{\max}$ ( $\text{min}^{-1}$ ) | $K_{\max(\text{WT})} / K_{\max}(\text{Mut})$ |
|-----------|-----------|----------------------------------|----------------------------------------------|
| TDG       | U·G       | $0.419 \pm 0.013$                | /                                            |
| TDG S200A | U·G       | $0.120 \pm 0.004$                | 3.49                                         |
| TDG K201A | U·G       | $0.092 \pm 0.005$                | 4.55                                         |
| TDG D202A | U·G       | $0.126 \pm 0.011$                | 3.33                                         |
| TDG R275A | U·G       | $0.010 \pm 0.002$                | 41.9                                         |

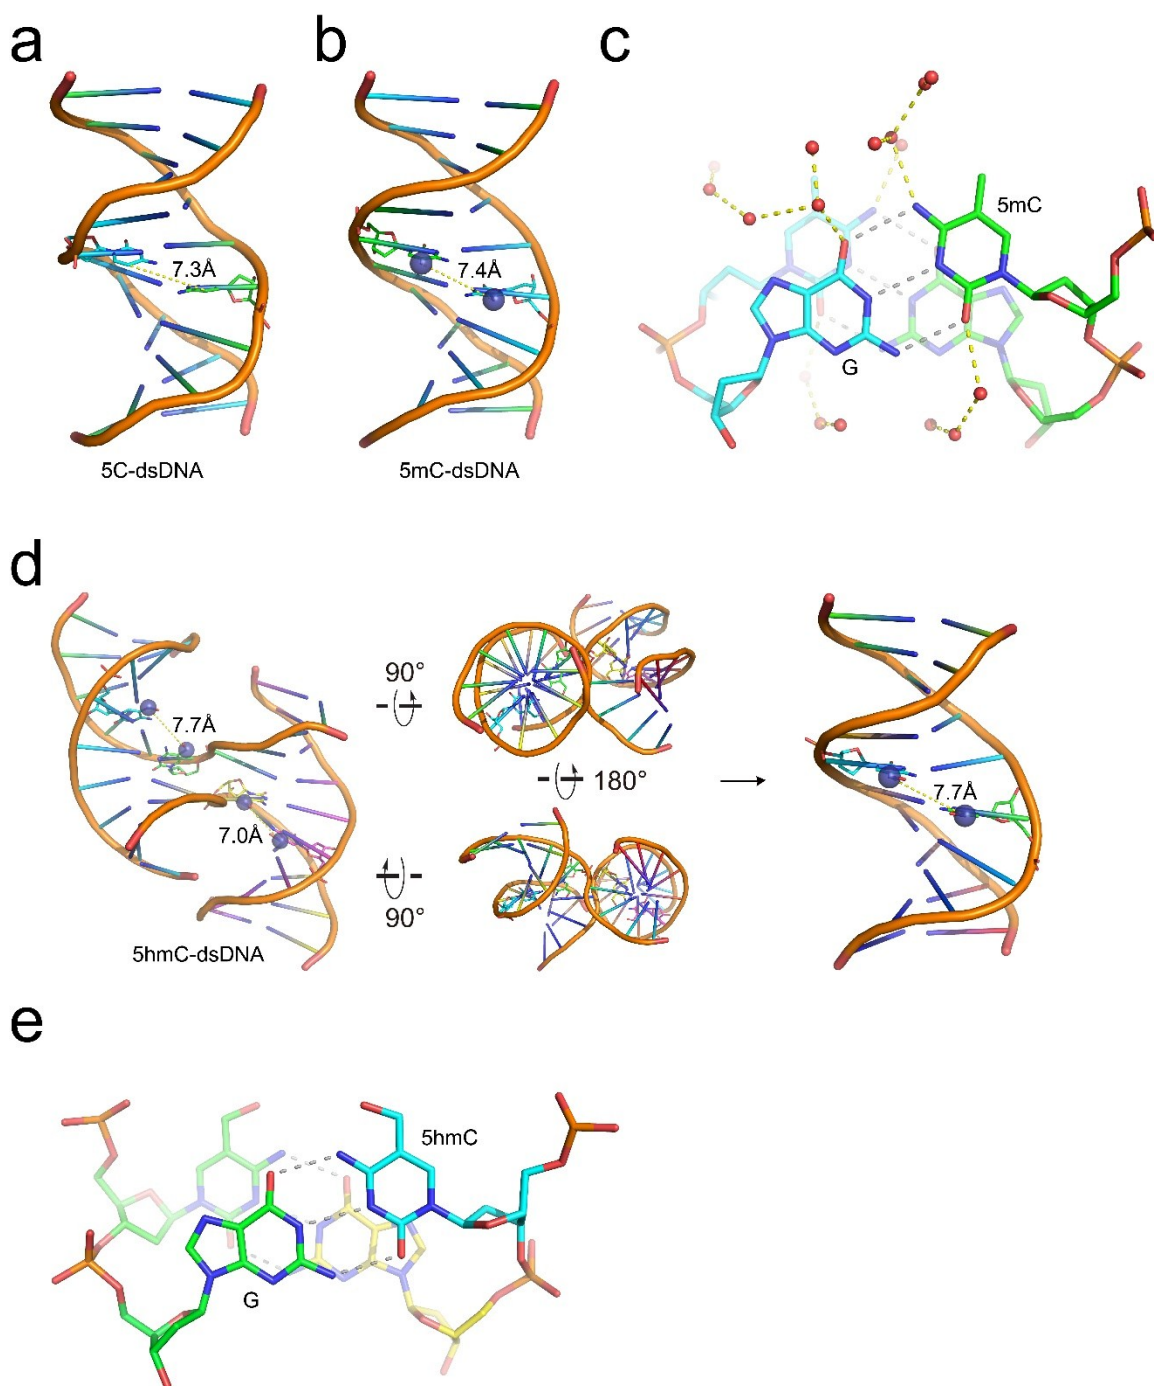

**Figure S1. Figure 1 | Schematic diagram of 5C-dsDNA, 5mC-dsDNA and 5hmC-dsDNA crystal structures.** (a) Overall structure of 5C-dsDNA (pdb code: 1EN9). Two complementary strands are colored in green and cyan, respectively. (b) Overall structure of 5mC-dsDNA. Two complementary strands are colored in green and cyan, respectively.

The fully symmetric 5mC bases are shown as sticks and their C5m atoms are shown as purple spheres. The distance between two C5m atoms is shown as yellow dashes. **(c)** The hydrogen bond networks around 5mC base pairing. The waters are shown in red dots. The hydrogen bonds are shown as yellow dashes. **(d)** Overall structure of 5hmC-dsDNA. Four complementary strands are colored in green, cyan, yellow and magenta, respectively. The overall structure is rotated to be viewed from the top or from the bottom. The regular B-formed dsDNA generated from the structure is also shown. The fully symmetric 5hmC bases are shown as sticks and their C5m atoms are shown as purple spheres. The distance between two C5m atoms is shown as yellow dashes. **(e)** The hydrogen bond networks within the 5hmC base pairing.

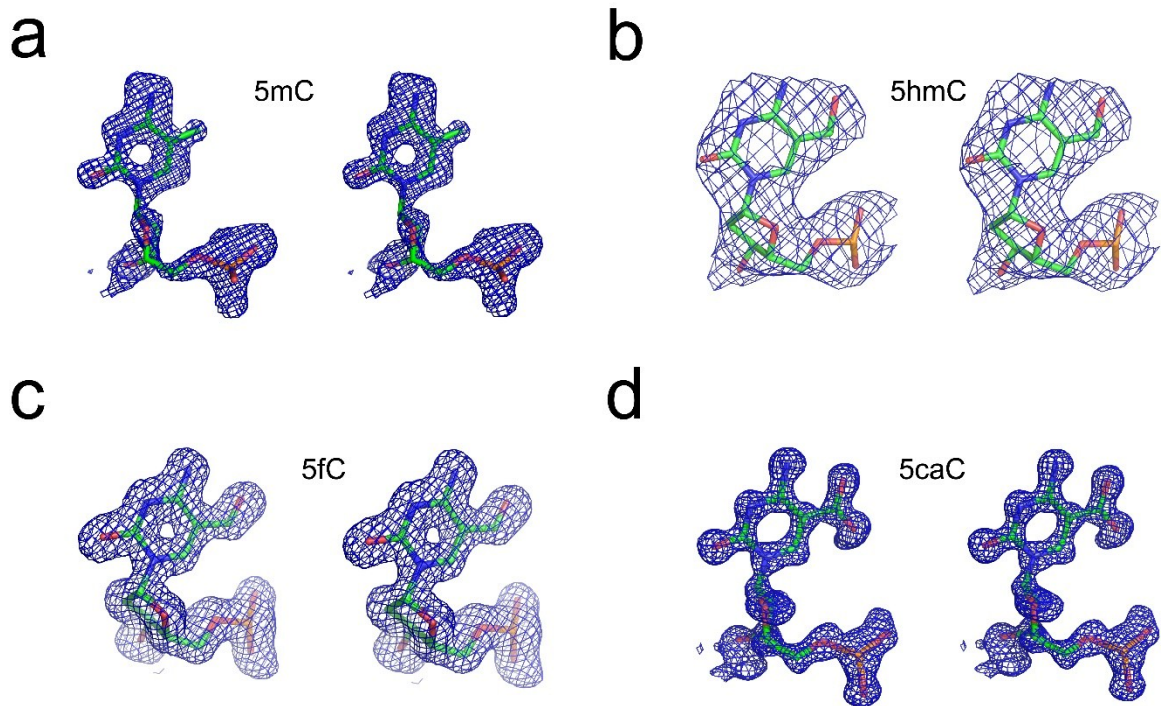

**Figure S2. Stereo view of fofc electron density map contoured at 2.0 $\sigma$  around 5mC (a), 5hmC (b), 5fC (c) and 5caC (d).**

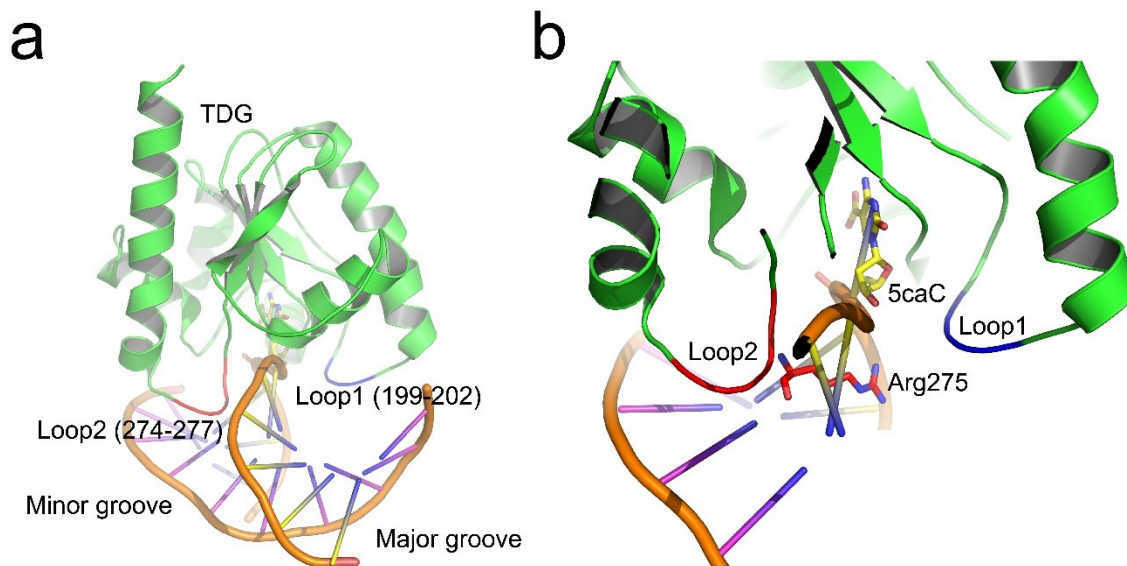

**Figure S3. Schematic diagram of TDG-DNA structure.** TDG and two DNA strands are colored in green, yellow and magenta respectively. 5caC base and residue R275 are shown as sticks. Two loops involved in DNA recognition are colored in blue and red respectively (PDB entry 3UO7).
